# Supplementary material
Source: HighWire-hosted journal article supplement (https://bmjopen.bmj.com/content/9/11/e031657)
Supplement: inline-supplementary-material-1 [file inline-supplementary-material-1.pdf]

## Appendix 1 – Pre-Operative Anticoagulant Use Survey

The questions listed below will be presented pre-operatively to determine any history of VTE and current use of anticoagulant medications. The questions were reviewed and approved by consumer representatives and will be specific to the medications and the site of DVT.

1. Are you currently taking any blood-thinning medication?
2. Do you know what blood thinning medication you are taking?
3. Have you ever been diagnosed with a clot in your legs (Deep Vein Thrombosis (DVT) or lungs (Pulmonary Embolism (PE)?
4. When did your most recent (or only) clot in your legs (DVT) or lungs (PE) occur?
