# Supplementary material
Source: HighWire-hosted journal article supplement (https://bmjopen.bmj.com/content/9/11/e031657)
Supplement: inline-supplementary-material-2 [file inline-supplementary-material-2.pdf]

## Appendix 2 – Postoperative VTE symptoms, occurrence and non-VTE complications

The following questions will be presented postoperatively at 90 days.

1. Did you take your blood thinning medication (to avoid blood clots) after leaving hospital following your joint replacement operation?
2. Do you know what blood thinning medication you are taking?
3. How long after the date of surgery did you take the blood thinning medication?
4. Are you still taking a blood thinning medication? If so, which one and why?
5. Since your joint replacement surgery, have you been diagnosed with a blood clot in your legs (DVT) or lungs (PE)?
6. Have you had any further surgery on your replaced joint (apart from when it was put in)?
  - i. Please select the reason(s) for the additional surgery/surgeries? (select all that apply)
7. Have you had any serious bleeding since the surgery from anywhere else in your body not related to your joint replacement?
